# Supplementary material
Source: PubMed Central journal article supplement (PMC2995387)
Supplement: supp_WNL.0b013e3181feb2bf_table_e-1.pdf [file supp_WNL.0b013e3181feb2bf_table_e-1.pdf]

**Table e-1. Cox Proportional Hazards Models Relating Cholesterol in 1968 to Mortality Over 32 Years in the PPSW**

| Serum Cholesterol                             | HR (95% CI)<br>Unadjusted | HR (95% CI)<br>Model 1 <sup>a</sup> | HR (95% CI)<br>Model 2 <sup>b</sup> |
|-----------------------------------------------|---------------------------|-------------------------------------|-------------------------------------|
| <i>Person years = 41,440 (n = 515 deaths)</i> |                           |                                     |                                     |
| > 6.5 mmol/l                                  | 1.80 (1.49-2.17)          | 1.28 (1.05-1.56)                    | 1.22 (1.00-1.49)                    |
| Quartile 1 (ref)                              | 1.00 (ref)                | 1.00 (ref)                          | 1.00 (ref)                          |
| Quartile 2                                    | 1.45 (1.10-1.91)          | 1.21 (0.91-1.60)                    | 1.18 (0.89-1.56)                    |
| Quartile 3                                    | 1.81 (1.38-2.38)          | 1.27 (0.96-1.68)                    | 1.20 (0.91-1.60)                    |
| Quartile 4                                    | 2.42 (1.87-3.14)          | 1.41 (1.07-1.85)                    | 1.29 (0.97-1.70)                    |

Abbreviations: HR = hazard ratio; CI = confidence interval

<sup>a</sup>Model 1 stratifies by age

<sup>b</sup>Model 2 controls for education, diastolic blood pressure, body mass index, and smoking status in 1968, and stratifies by age
