# Supplementary material
Source: PubMed Central journal article supplement (PMC2995387)

Figure e-1. The PPSW: Thirty-two year relationship between cholesterol and dementia.

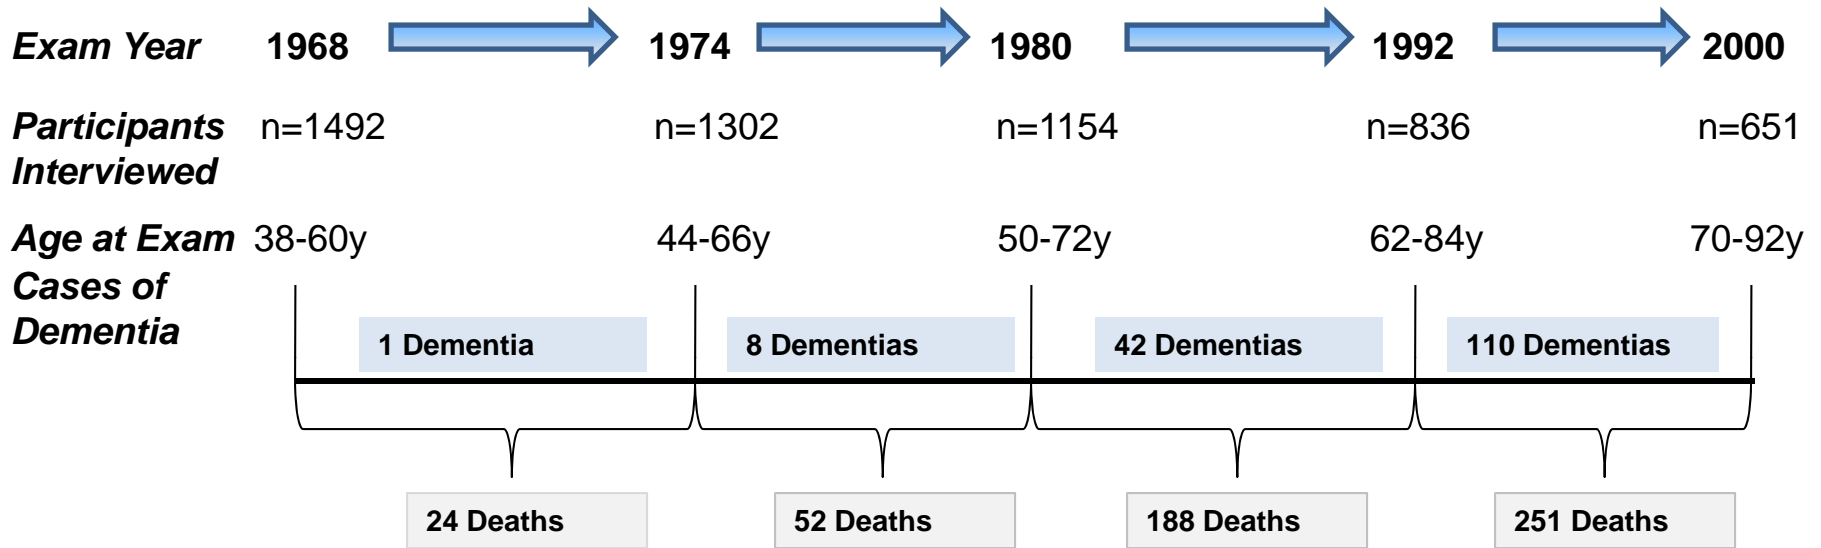

Supplement: supp_WNL.0b013e3181feb2bf_figure_e-1.pdf [file supp_WNL.0b013e3181feb2bf_figure_e-1.pdf]
